# Supplementary material for: KOH-Based Hydrothermal Synthesis of Iron-Rich Titanate Nanosheets Assembled into 3D Hierarchical Architectures from Natural Ilmenite Mineral Sands
Source: MDPI journal article supplement (doi:10.3390/min13030406), 2023-03-15
Supplement: s1 [file s1]

## Supplementary Material

# KOH-based hydrothermal synthesis of iron-rich titanate nanosheets assembled into 3D hierarchical architectures from natural ilmenite sands

Karina J. Lagos<sup>1,2</sup>, Bojan A. Marinkovic<sup>3,\*</sup>, Anja Dosen<sup>4</sup>, Alexis Debut<sup>5</sup>, Karla Vizuite<sup>5</sup>, Victor H. Guerrero<sup>2</sup>, Emilio Pardo<sup>1</sup> and Patricia I. Pontón<sup>2,\*</sup>

<sup>1</sup> Molecular Science Institute, Coordination Chemistry Group, University of Valencia, 46980 Paterna, Spain; karina.lagos@epn.edu.ec (K.J.L.); emilio.pardo@uv.es (E.P.)

<sup>2</sup> Department of Materials, Escuela Politécnica Nacional (EPN), 170525 Quito, Ecuador;

<sup>3</sup> Department of Chemical and Materials Engineering, Pontifical Catholic University of Rio de Janeiro (PUC-Rio), 22453-900 Rio de Janeiro, Brazil

<sup>4</sup> International Centre for Diffraction Data (ICDD), Newtown Square, 19073 PA, USA; dosen@icdd.com

<sup>5</sup> Centro de Nanociencia y Nanotecnología, Universidad de las Fuerzas Armadas (ESPE), 171103, Sangolquí, Ecuador; apdebut@espe.edu.ec (A.D.); ksvizuite@espe.edu.ec (K.V.)

\* Correspondence: bojan@puc-rio.br (B.A.M.); patricia.ponton@epn.edu.ec (P.I.P.)

### A. SEM images of additional experiments that tested different KOH-AHT conditions

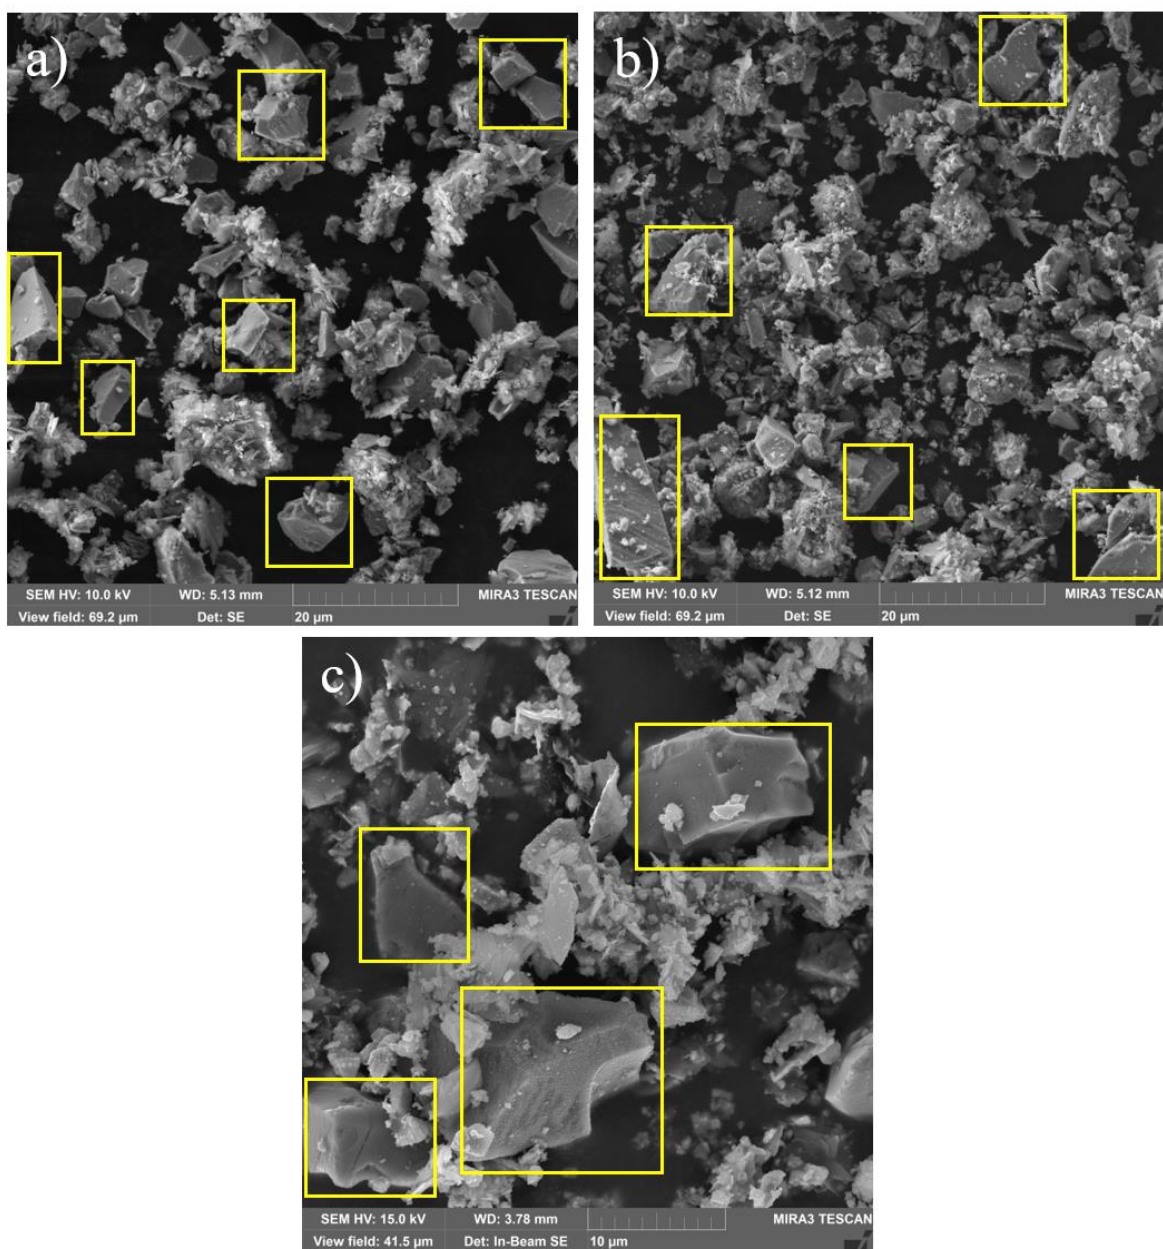

**Figure S1.** SEM images of KOH-AHTs at 180 °C: (a) KOH (12M) / 72 h; (b) KOH (10M) / 72 h / ~30 bar; (c) KOH (10M) / 72 h + 72 h. The squares show remaining precursor particles.

## B. Quantitative XRPD analyses

The quantitative XRPD analysis was performed without considering the trace amounts of orthoclase feldspar and zircon.

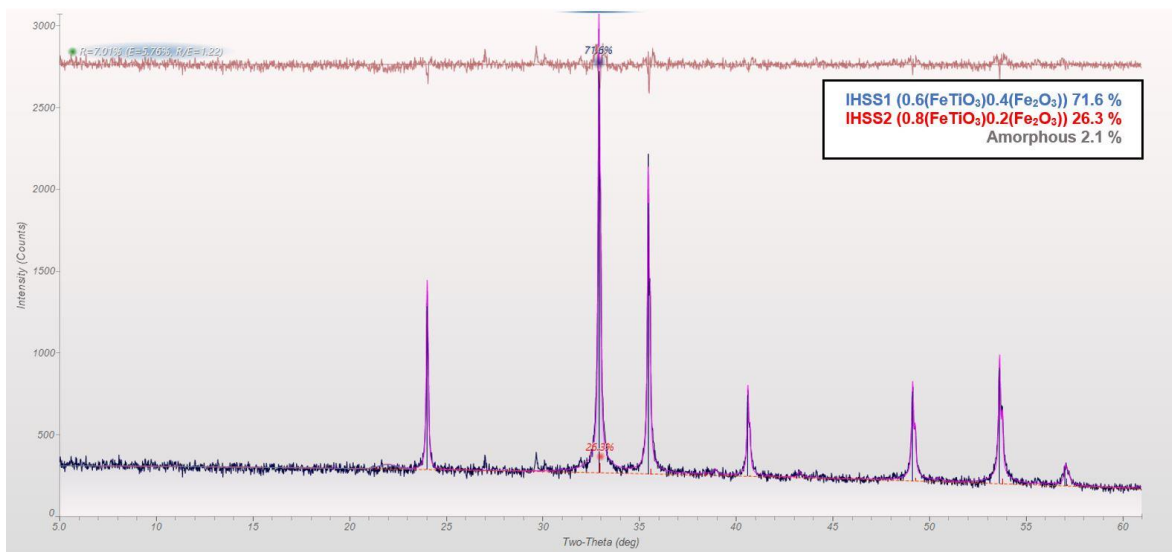

**Figure S2.** Fitting of the Ecuadorian ilmenite sands precursor.

## C. SEM images of the surface of Ecuadorian ilmenite sand particles

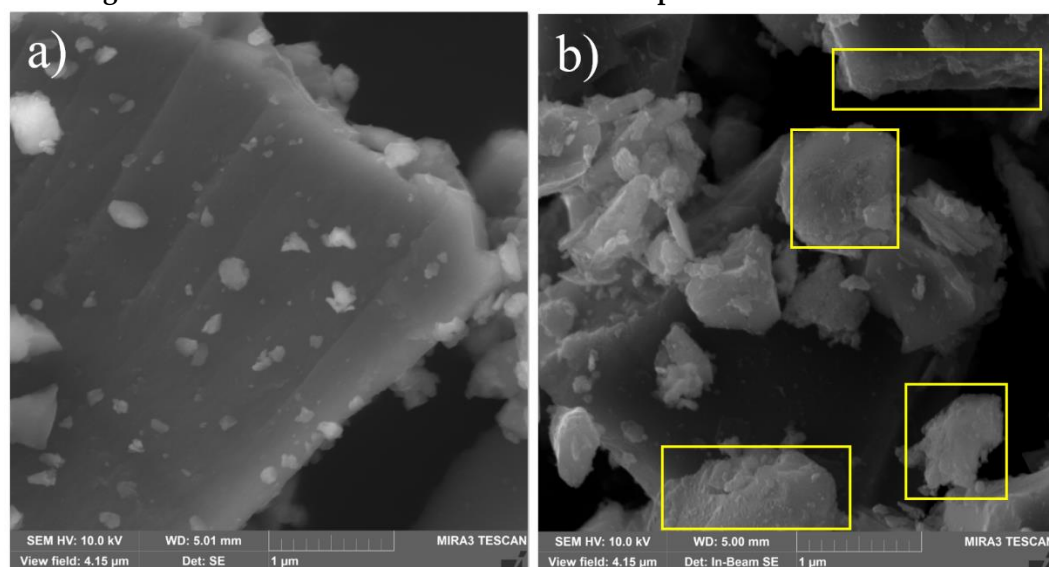

**Figure S3.** SEM images of (a) the surface of the precursor (smooth), and (b) the surface of the remaining precursor after 24 h of KOH-AHT exposure (rougher and flawed areas marked in yellow).

## D. Elemental mapping analysis of the KOH-product obtained at 72 h

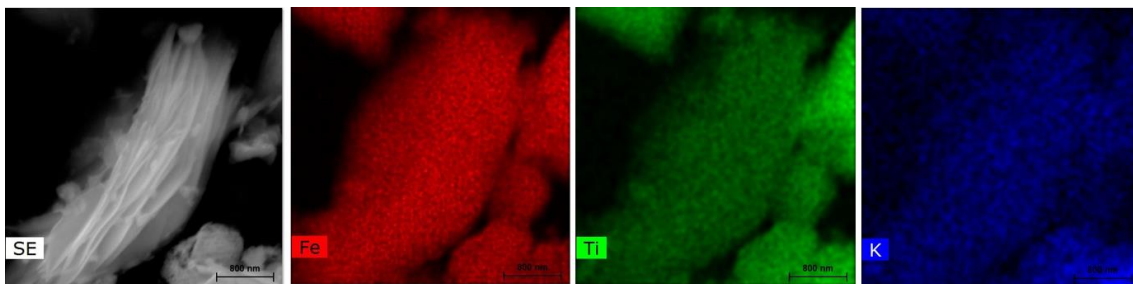

**Figure S4.** Elemental mapping analysis of the KOH-product obtained at 72 h.

**E. SEM image of remaining nanosheets of the KOH-product obtained at 96 h**

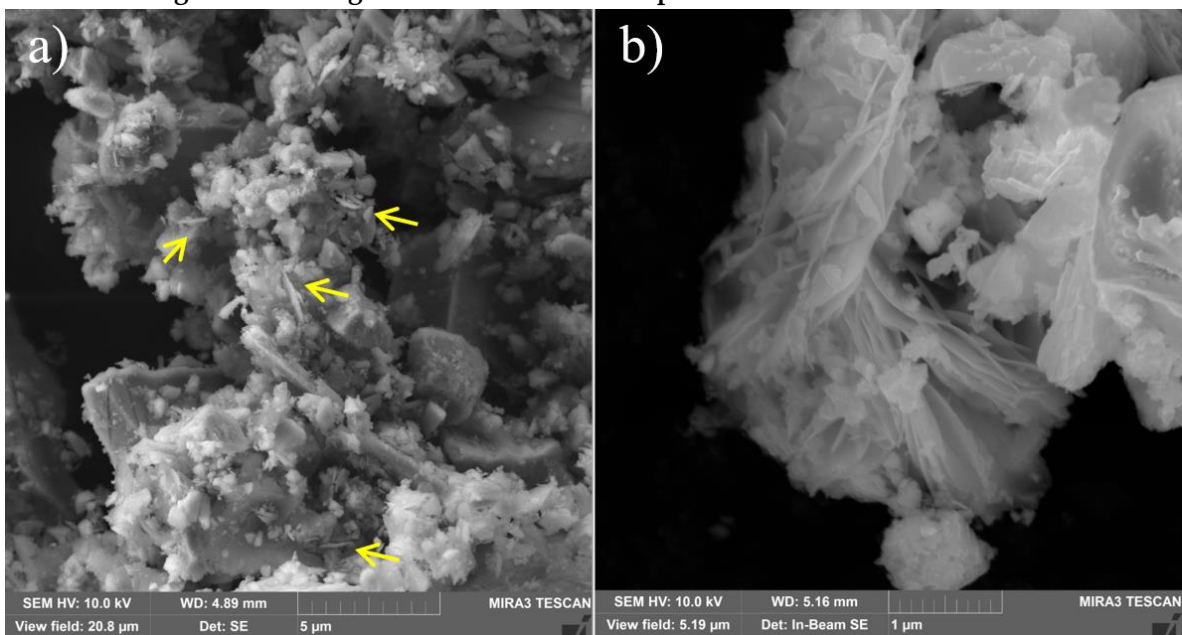

**Figure S5.** (a,b) Remaining nanosheets within KOH-product obtained at 96 h.
